# Supplementary material
Source: PubMed Central journal article supplement (PMC7044793)
Supplement: Supp_Fig1.pdf [file Supp_Fig1.pdf]

## Supplementary Data

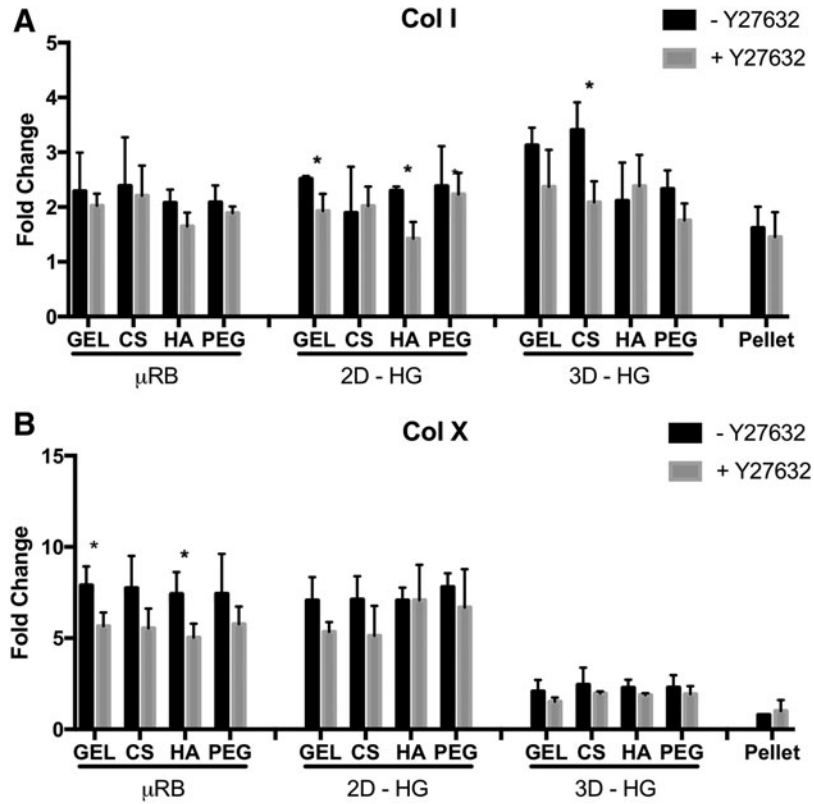

**SUPPLEMENTARY FIG. S1.** Y27632 has minimal effects on expression of (A) collagen type I and (B) collagen type X. All gene expressions are reported as fold of change at day 7, normalized to untreated MSCs in monolayer on tissue culture plastic at day 1. Data are reported as mean  $\pm$  SD ( $n=3$ /group). \* $p < 0.05$  indicates statistically significant difference between the paired groups with or without Y27632 within a culture model and the same biomaterial composition. SD, standard deviation; MSC, mesenchymal stem cell.
