# Supplementary material
Source: PubMed Central journal article supplement (PMC7044793)
Supplement: Supp_Fig2.pdf [file Supp_Fig2.pdf]

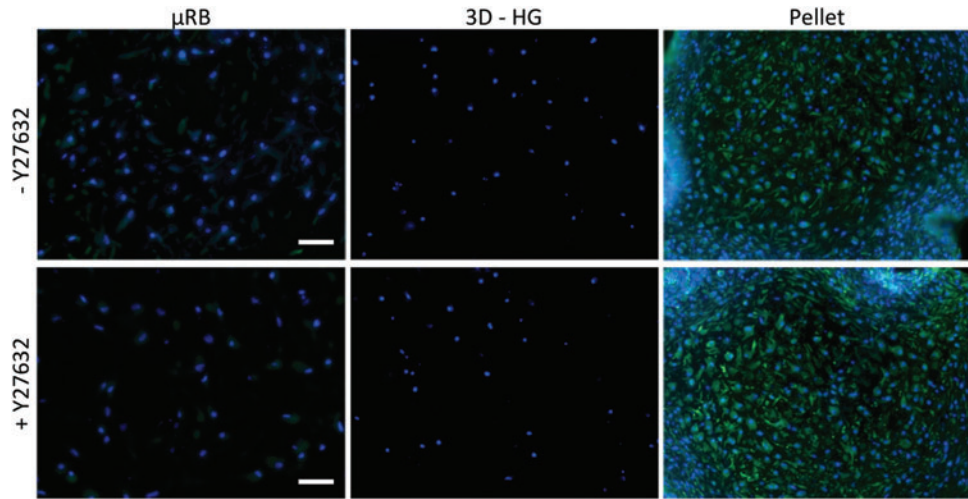

**SUPPLEMENTARY FIG. S2.** Immunostaining of lubricin, a marker for superficial zone cartilage, by MSCs in GEL  $\mu$ RB, GEL 3D-HG, and pellet cultures. Scale bars: 100  $\mu$ m.  $\mu$ RB, microribbon; GEL, gelatin; 3D-HG, three-dimensional hydrogel.
