# Supplementary material
Source: PubMed Central journal article supplement (PMC7044793)
Supplement: Supp_Fig3.pdf [file Supp_Fig3.pdf]

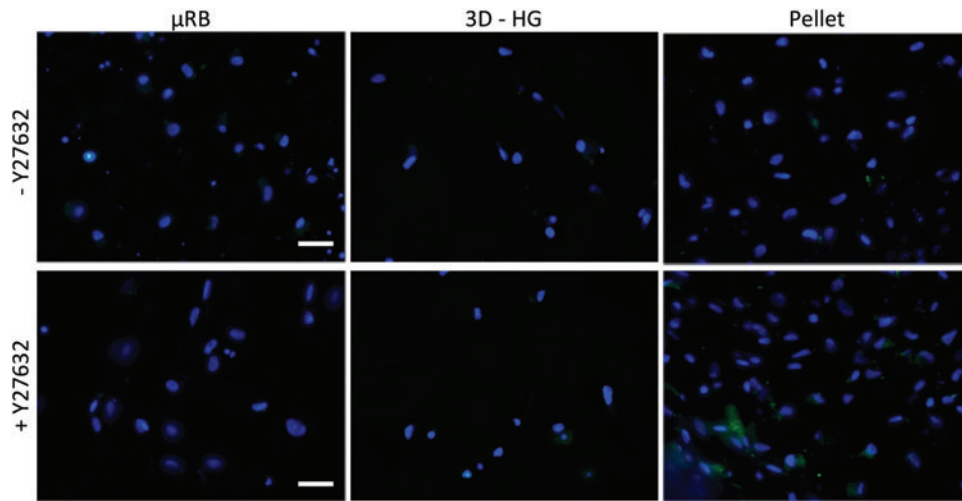

**SUPPLEMENTARY FIG. S3.** Immunostaining of 4',6-diamidino-2-phenylindole for visualization of cell density at day 21. Three groups were stained, including GEL  $\mu$ RB, GEL 3D-HG, and pellet culture. Scale bars: 100  $\mu$ m.
